# Supplementary figures and images for: Anti-cancer activity of zinc-tetraphenylporphyrin photosensitizer/dextran-graft-polyacrylamide copolymer/Au(Ag) nanoparticle nanohybrids
Source: Royal Society of Chemistry journal article supplement (doi:10.1039/d3ra07825f), 2024-01-01

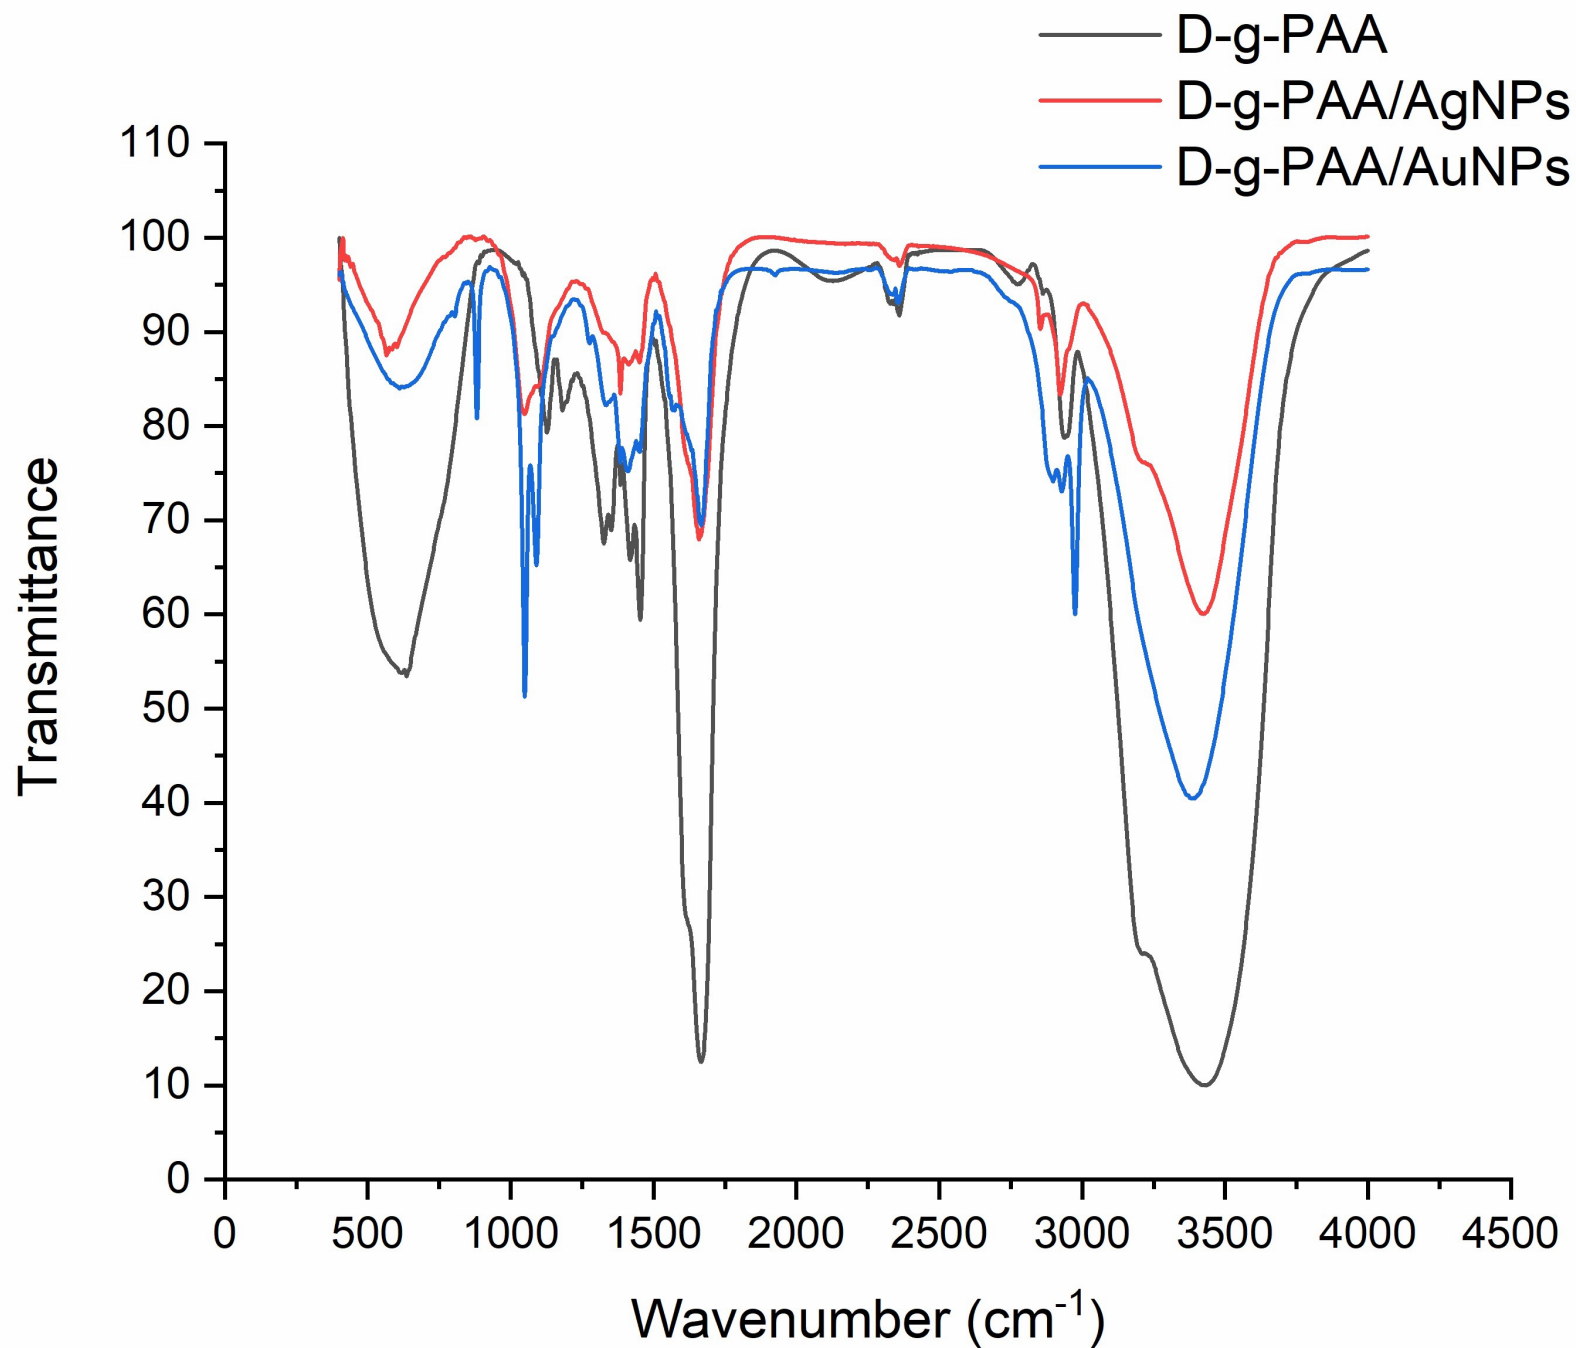

Supplement: d3ra07825f1.pdf [file d3ra07825f1.pdf]
